# Supplementary material for: Fluorescent Probe combined with Novel Rapid Microbial Analyzer for Detection of Contaminated Pathogen in Coconut
Source: Research Square preprint supplement (doi:10.21203/rs.3.rs-1822573/v1), 2022-07-19
Supplement: Supplementary file 1 [file d257f15faac13f3ec0f5eba9.docx]

***Supporting information***

Fluorescent Probe combined with Novel Rapid Microbial Analyzer for Detection of Contaminated pathogen in Coconut

Qian Cui,a,# Yongjie Zhong, a,# Fuming Deng,b Buhua Wang,a Ling Zhang,a Jiajia Wu,c Peng Wang,c Liudang Wan,a Keling Wang,d Lingchen Fang,a Rui Dai,a Han Zhang,a Jiaomei Huang,a,* Yi Wan a,*

a.State Key Laboratory of Marine Resource Utilization in South China Sea, Hainan University, Haikou 570228, China.

b Coconut Research Center, Coconut Research Institute, Chinese Academy of Tropical Agricultural Science(CATAS), Haikou 570228, China.

c.CAS Key Laboratory of Marine Environmental Corrosion and Bio-fouling Institute of Oceanology, Chinese Academy of Sciences, Qingdao 266071, China.

Corresponding Author

*Prof. Yi Wan (993602@hainanu.edu.cn )

*Dr. Jiaomei Huang (huangjm200@163.com)

1. Instruments and reagents

The following instruments were used in this study: Autoclave; Constant temperature incubator; Clean bench; Pipette guns; Sterile syringes; Fluorescent Probe combined with Novel Rapid Microbial Analyzer. Sodium chloride, tryptone, yeast powder and agar were used in this study.

Coconut water used in this study comes from Coconut Institute of Chinese Academy of Tropical Agricultural Sciences. Four strains were commercially purchased, including: *Escherichia coli* (CICC 10389), *Staphylococcus aureus* (CICC 10384), *Pseudomonas aeruginosa* (CICC 21625), and *Salmonella typhi* (CICC 21484).

1. Experimental method

2.1 Material preparation

Preparation of Luria−Bertani solid medium: 10 g tryptone, 5 g yeast powder, 10 g sodium chloride and 15 g agar were added to a volume of 1000 mL together with ultrapure water, and the mixture was heated to melt to adjust the pH to 7.4. The prepared LB solid medium and coconut water samples were put into a sterilization pot and sterilized at 121 ℃ for 30 minutes. After sterilization, the culture medium was cooled to about 55 ℃ and poured into a culture dish, after solidification, they were kept at 4℃ for later use. The sterilized coconut water was used as a negative sample control for later use.

2.2 Bacterial dilution

Gradient dilution was initially carried out by 10-fold dilution of the known concentration *Escherichia coli* solution with sterilized negative sample, followed by another 10-fold dilution with normal saline as the final sample for later use. Meanwhile, same dilution procedure was followed for *Staphylococcus aureus, Salmonella typhimurium* and *Pseudomonas aeruginosa* and prepared for later use.


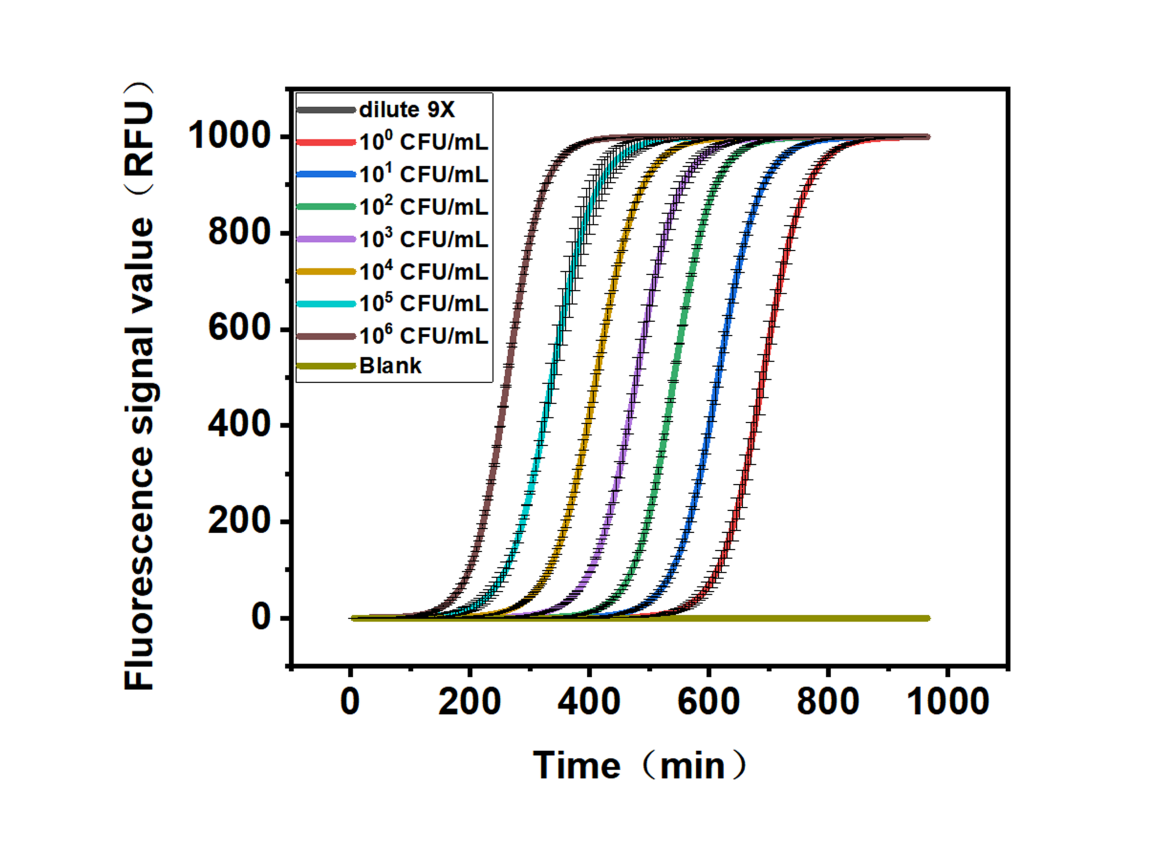


Figure S1. The standard curve for the detection of *E. coli* in coconut water was established based on the results of multiple experiments. The data in the figure were obtained from the average values of the results of multiple tests. This figure is in addition to figure 3A in that text.





Figure S2. The first set of gradient results are from multiple experiments and the data in this plot are derived from the mean of the original results from multiple tests. This figure is in addition to figure 4E in that text.





Figure S3. The second set of gradient results are from multiple experiments and the data in this plot are derived from the mean of the original results from multiple tests. This figure is in addition to figure 4E in that text.

TS1. Test results of actual samples.

| Project | Instrument counting | Plate counting |
| --- | --- | --- |
| Sample 1 | 0CFU/mL | 0CFU/mL |
| Sample 2 | 5.25×106 CFU/mL | 1.37×106 CFU/mL |
| Sample 3 | 0 CFU/mL | 0CFU/mL |
| Sample 4 | 0 CFU/mL | 0CFU/mL |
| Sample 5 | 0 CFU/mL | 0CFU/mL |
| Sample 6 | 0 CFU/mL | 0CFU/mL |
| Sample 7 | 0 CFU/mL | 0CFU/mL |

This table complements figure 5D in this text. Figure 5D shows the test results of three samples we selected from a series of actual samples, and the test results of the remaining samples are listed in this table TS1. The instrumented bacterial values of the actual samples are calculated in the same order of magnitude as the plate control values.
